1  
2  
3  
4  
5  
6  
7  
8  
9  
10  
11  
12  
13  
14  
15  
16  
17  
18  
19  
20  
21  
22  
23  
24  
25  
26  
27

## Single cell genomics reveals plastid-lacking Picozoa are close relatives of red algae

Max E. Schön<sup>1,2</sup>, Vasily V. Zlatogursky<sup>1</sup>, Rohan P. Singh<sup>3</sup>, Camille Poirier<sup>4,5</sup>, Susanne Wilken<sup>5</sup>, Varsha Mathur<sup>6</sup>, Jürgen F. H. Strasser<sup>1</sup>, Jarone Pinhassi<sup>7</sup>, Alexandra Z. Worden<sup>4,5</sup>, Patrick J. Keeling<sup>6</sup>, Thijs J. G. Ettema<sup>8</sup>, Jeremy G. Wideman<sup>3</sup>, Fabien Burki<sup>1,9\*</sup>

<sup>1</sup>Department of Organismal Biology, Program in Systematic Biology, Uppsala University, Uppsala, Sweden

<sup>2</sup>Department of Cell and Molecular Biology, Program in Molecular Evolution, Uppsala University, Uppsala, Sweden

<sup>3</sup>Biodesign Center for Mechanisms of Evolution, School of Life Sciences, Arizona State University, Tempe, AZ, USA

<sup>4</sup>Ocean EcoSystems Biology, RD3, GEOMAR Helmholtz Centre for Ocean Research Kiel, Germany

<sup>5</sup>Monterey Bay Aquarium Research Institute, Moss Landing, CA, USA

<sup>6</sup>Department of Botany, University of British Columbia, Vancouver, British Columbia, Canada

<sup>7</sup>Centre for Ecology and Evolution in Microbial Model Systems – EEMiS, Linnaeus University, Kalmar, Sweden

<sup>8</sup>Laboratory of Microbiology, Wageningen University and Research, NL-6708 WE Wageningen, The Netherlands

<sup>9</sup>Science for Life Laboratory, Uppsala University, Uppsala, Sweden

Present address (VVZ): Department of Invertebrate Zoology, Faculty of Biology, St. Petersburg State University, Russia

Present address (JFHS): Department of Ecosystem Research, Leibniz Institute of Freshwater Ecology and Inland Fisheries, Berlin, Germany

Present address (CP): Department of Zoology, University of Oxford, 11a Mansfield Road, Oxford OX1 3SZ, UK

Present address (SW): Institute for Biodiversity and Ecosystem Dynamics, University of Amsterdam, NL

\*Corresponding author: [fabien.burki@ebc.uu.se](mailto:fabien.burki@ebc.uu.se)

## 28 **Abstract**

29 The endosymbiotic origin of plastids from cyanobacteria gave eukaryotes photosynthetic capabilities and  
30 launched the diversification of countless forms of algae. These primary plastids are found in members of the  
31 eukaryotic supergroup Archaeplastida. All known archaeplastids still retain some form of primary plastids,  
32 which are widely assumed to have a single origin. Here, we used single-cell genomics from natural samples  
33 combined with phylogenomics to infer the evolutionary origin of the phylum Picozoa, a globally distributed but  
34 seemingly rare group of marine microbial heterotrophic eukaryotes. Strikingly, the analysis of 43 single-cell  
35 genomes shows that Picozoa belong to Archaeplastida, specifically related to red algae and the phagotrophic  
36 rhodelphids. These picozoan genomes support the hypothesis that Picozoa lack a plastid, and further reveal no  
37 evidence of an early cryptic endosymbiosis with cyanobacteria. These findings change our understanding of  
38 plastid evolution as they either represent the first complete plastid loss in a free-living taxon, or indicate that red  
39 algae and rhodelphids obtained their plastids independently of other archaeplastids.

40

## 41 **Introduction**

42 The origin of plastids by endosymbiosis between a eukaryotic host and cyanobacteria was a fundamental  
43 transition in eukaryotic evolution, giving rise to the first photosynthetic eukaryotes. These ancient primary  
44 plastids, estimated to have originated >1.8 billion years ago<sup>1</sup>, are found in Rhodophyta (red algae),  
45 Chloroplastida (green algae, including land plants), and Glaucophyta (glaucophytes)—together forming the  
46 eukaryotic supergroup Archaeplastida<sup>2</sup>. Unravelling the complex sequence of events leading to the establishment  
47 of the cyanobacterial endosymbiont in Archaeplastida is complicated by antiquity, and by the current lack of  
48 modern descendants of early-diverging relatives of the main archaeplastidan groups in culture collections or  
49 sequence databases. Indeed, the only other known example of primary endosymbiosis are the chromatophores in  
50 one unrelated genus of amoeba (*Paulinella*), which originated about a billion years later<sup>3,4</sup>. Recently, two newly  
51 described phyla (Prasinodermophyta and Rhodelphidia) were found to branch as sister to green and red algae,  
52 respectively<sup>5,6</sup>. Most transformative was the discovery that rhodelphids are obligate phagotrophs that maintain  
53 cryptic non-photosynthetic plastids, implying that the ancestor of red algae was mixotrophic, a finding that  
54 greatly alters our perspectives on early archaeplastid evolution<sup>5</sup>.

55 While there is substantial evidence that Archaeplastida is a group descended from a photosynthetic ancestor,  
56 non-photosynthetic and plastid-lacking lineages have been found to branch near the base or even within  
57 archaeplastids in phylogenomic trees. For example, Cryptista (which includes plastid-lacking and secondary  
58 plastid-containing species), have been inferred to be sister to either green algae and glaucophytes<sup>7</sup>, or red  
59 algae<sup>5,8</sup>, although other phylogenomic analyses have recovered the monophyly of Archaeplastida to the  
60 exclusion of the cryptists<sup>5,9,10</sup>. Another non-photosynthetic group that recently showed affinities to red algae  
61 based on phylogenomics is Picozoa<sup>5,9,10</sup>. But as for cryptists, the position of Picozoa has lacked consistent

62 support, mostly because there is no member of Picozoa available in continuous culture, and genomic data are  
63 currently restricted to a few, incomplete, single amplified genomes (SAGs)<sup>11</sup>. Thus, the origin of Picozoa  
64 remains unclear.

65 Picozoa (previously known as picobiliphytes) were first described in 2007 in marine environmental clone  
66 libraries of the 18S ribosomal RNA (rRNA) gene and observed by epifluorescence microscopy in temperate  
67 waters<sup>12</sup>. Due to orange autofluorescence reminiscent of the photosynthetic pigment phycobiliprotein and  
68 emanating from an organelle-like structure, picozoans were initially described as likely containing a plastid.  
69 Orange fluorescence was also observed in association with these uncultured cells in subtropical waters<sup>13</sup>.  
70 However, the hypothesis that the cells were photosynthetic was challenged by the characterization of SAG data  
71 from three picozoan cells isolated by fluorescence-activated cell sorting (FACS)<sup>11</sup>. The analysis of these SAGs  
72 revealed neither plastid DNA nor nuclear-encoded plastid-targeted proteins, but the scope of these conclusions is  
73 limited due to the small number of analyzed cells and their highly fragmented and incomplete genomes<sup>11</sup>. Most  
74 interestingly, a transient culture was later established, enabling the formal description of the first (and so far  
75 only) picozoan species—*Picomonas judraskeda*—as well as ultrastructural observations with electron  
76 microscopy<sup>14</sup>. These observations revealed an unusual structural feature in two body parts, a feeding strategy by  
77 endocytosis of nano-sized colloid particles, and confirmed the absence of plastids<sup>14</sup>. Only the 18S rRNA gene  
78 sequence of *P. judraskeda* is available as the transient culture was lost before genomic data could be generated.  
79 Here, we present an analysis of genomic data from 43 picozoan single-cell genomes sorted with FACS from the  
80 Pacific Ocean off the California coast and from the Baltic Sea. Using a gene and taxon-rich phylogenomic  
81 dataset, these new data allowed us to robustly infer Picozoa as a lineage of archaeplastids, branching with red  
82 algae and rhodophids. With this expanded genomic dataset, we confirm Picozoa as the first archaeplastid  
83 lineage lacking a plastid. We discuss the important implications that these results have on our understanding of  
84 the origin of plastids.

85

## 86 **Results**

### 87 *Single cell assembled genomes representative of Picozoa diversity*

88 We isolated 43 picozoan cells (40 from the eastern North Pacific off the coast of California, 3 from the Baltic  
89 Sea) using FACS and performed whole genome amplification by multiple displacement amplification (MDA).  
90 The taxonomic affiliation of the SAGs was determined either by PCR with Picozoa-specific primers<sup>14</sup> or 18S  
91 rRNA gene sequencing using general eukaryotic primers, followed by Illumina sequencing of the MDA products  
92 (see methods). The sequencing reads were assembled into genomic contigs, with a total assembly size ranging  
93 from 350 kbp to 66 Mbp (Fig 1a, Table S1). From these contigs, the 18S rRNA gene was found in 37 out of the  
94 43 SAGs, which we used to build a phylogenetic tree with reference sequences from the protist ribosomal  
95 reference PR2 database (Fig S1). Based on this tree, we identified 6 groups representing 32 SAGs that possessed

96 nearly identical 18S rRNA gene sequences. These SAGs with identical ribotype were reassembled by pooling all  
97 reads in order to obtain longer, more complete co-assemblies (CO-SAGs). The genome size of the CO-SAGs  
98 ranged from 32 Mbp to 109 Mbp (Fig 1a, Tab S1), an increase of 5% to 45% over individual SAGs. The genome  
99 completeness of the SAGs and CO-SAGs was estimated based on two datasets: (i) a set of 255 eukaryotic  
100 marker genes available in BUSCO<sup>15</sup>, and (ii) a set of 317 conserved marker genes derived from a previous pan-  
101 eukaryote phylogenomic dataset<sup>1</sup> that we used here as starting point (Fig 1b). These comparisons showed that  
102 while most SAGs were highly incomplete (Fig 1a and b), the CO-SAGs were generally more complete (up to  
103 60%). When taken together, 90% of the BUSCO markers and 88% of the phylogenomic markers were present in  
104 at least one assembly, suggesting that while the single-cell genome assemblies are fragmentary, they together  
105 represent a much more complete Picozoa meta-assembly.

106 The final 17 assemblies (11 SAGs and 6 CO-SAGs) were mainly placed within the three proposed groups of  
107 Picozoa BP1-3 (Fig 1c), sensu Cuvelier et al. (2008)<sup>13</sup>. One SAG (SAG11) was placed outside of these groups.  
108 The deep-branching picozoan lineages identified by Moreira and López-García (2014)<sup>16</sup>, as well as other  
109 possibly early-diverging lineages were not represented in our data (Fig 1c). Interestingly, one CO-SAG  
110 (COSAG03) was closely related (18S rRNA gene 100% identical) to the only described species, *Picomonas*  
111 *judraskeda*, for which no genomic data are available. Using our assemblies and reference sequences from PR2 as  
112 queries, we identified by sequence identity 362 OTUs related to Picozoa ( $\geq 90\%$ ) in the data provided by the  
113 *Tara* Oceans project<sup>17</sup>. Picozoa were found in all major oceanic regions, but had generally low relative  
114 abundance in V9 18S rRNA gene amplicon data (less than 1% of the eukaryotic fractions in most cases, Fig S2).  
115 An exception was the Southern Ocean between South America and Antarctica, where the Picozoa-related OTUs  
116 in one sample represented up to 30% of the V9 18S rRNA gene amplicons. Thus, Picozoa seems widespread in  
117 the oceans but generally low in abundance based on available sampling, although they can reach higher relative  
118 abundances in at least circumpolar waters.

## 119 120 *Phylogenomic dataset construction*

121 To infer the evolutionary origin of Picozoa, we expanded on a phylogenomic dataset that contained a broad  
122 sampling of eukaryotes and a large number of genes that was recently used to study deep nodes in the eukaryotic  
123 tree<sup>1</sup>. Homologues from the SAGs and CO-SAGs as well as a number of newly sequenced key eukaryotes were  
124 added to each single gene (see Table S2 for a list of taxa). After careful examination of the single genes for  
125 contamination and orthology based on individual phylogenies (see material and methods), we retained all six  
126 CO-SAGs and four individual SAGs together with the available SAG MS584-11 from a previous study<sup>11</sup>. The  
127 rest of the SAGs were excluded due to poor data coverage (less than 5 markers present) and, in one case  
128 (SAG33), because it was heavily contaminated with sequences from a cryptophyte (see Data availability for  
129 access to the gene trees). In total, our phylogenomic dataset contained 317 protein-coding genes, with  
130 orthologues from Picozoa included in 279 genes (88%), and 794 taxa (Fig 1b). This represents an increase in

131 gene coverage from 18% to 88% compared to the previously available genomic data for Picozoa. The most  
132 complete assembly was CO-SAG01, from which we identified orthologues for 163 (51%) of the markers.

### 133 *Picozoa group with Rhodophyta and Rhodelphidia*

134 Concatenated protein alignments of the curated 317 genes were used to infer the phylogenetic placement of  
135 Picozoa in the eukaryotic Tree of Life. Initially, a maximum likelihood (ML) tree was reconstructed from the  
136 complete 794-taxa dataset using the site-homogeneous model LG+F+G and ultrafast bootstrap support with  
137 1,000 replicates (Fig S3). This analysis placed Picozoa together with a clade comprising red algae and  
138 rhodelphids with strong support (100% UFBoot2), but the monophyly of Archaeplastida was not recovered due  
139 to the internal placement of the cryptists. To further investigate the position of Picozoa, we applied better-fitting  
140 site-heterogeneous models to a reduced dataset of 67 taxa, since these models are computationally much more  
141 demanding. The process of taxon reduction was driven by the requirement of maintaining representation from all  
142 major groups, while focusing sampling on the part of the tree where Picozoa most likely belong to, i.e.  
143 Archaeplastida, TSAR, Haptista and Cryptista. We also merged several closely related lineages into OTUs based  
144 on the initial ML tree in order to reduce missing data (Table S3). This 67-taxa dataset was used in ML and  
145 Bayesian analyses with the best-fitting site-heterogeneous models LG+C60+F+G+PMSF (with non-parametric  
146 bootstrapping) and CAT+GTR+G, respectively. Both ML and Bayesian analyses produced highly similar trees,  
147 and received maximal support for the majority of relationships, including deep divergences (Fig 2). Most  
148 interestingly, both analyses recovered the monophyly of Archaeplastida (BS=93%; PP=1), with cryptists as sister  
149 lineage (BS=100%; PP=1). Consistent with the initial ML tree (Fig S3), red algae and rhodelphids branched  
150 together (BS=95%; PP=1), with Picozoa as their sister with full support (BS=100%; PP=1). This grouping was  
151 robust to fast-evolving sites removal analysis (Fig S4), trimming of the 25% and 50% compositionally most  
152 biased sites (Fig S5), and was also recovered in a supertree method (ASTRAL-III) consistent with the multi-  
153 species coalescent model (Fig S6). Although this group is robust, we observed one variation in the branching  
154 order between Picozoa, rhodelphids and red algae when trimming the 50% most heterogenous sites (Fig S7) and  
155 after removing genes with less than two picozoan sequences (Fig S8). In these analyses, Picozoa and red algae  
156 were most closely related, although this relationship was never significantly supported. An approximately  
157 unbiased (AU) test rejected all tested topologies except in the two cases where Picozoa branched as the closest  
158 sister to red algae ( $p=0.237$ ) and the topology of Fig 2 ( $p=0.822$ ; Table S4). Finally, we identified in Picozoa and  
159 rhodelphids a two amino acids replacement signature in the eukaryotic translation elongation factor 2 protein  
160 (SA instead of the ancestral GS residues, see Supplementary Data S1) that was previously shown to unite red  
161 and green algae (and land plants), haptophytes and some cryptists<sup>18</sup>. The presence of SA in Picozoa supports  
162 their affiliation with red algae and rhodelphids.

163

164 *Picozoa SAGs show no evidence of a plastid*

165 Since there have been conflicting conclusions about the occurrence of plastids in picozoans, we extensively  
166 searched our genomic data for evidence of cryptic plastids. First, we searched the SAG and CO-SAG assemblies  
167 for plastidial contigs as evidence of a plastid genome. While there were some contigs that initially showed  
168 similarities to reference plastid genomes, these were all rejected as bacterial (non-cyanobacterial) contamination  
169 upon closer inspection. In contrast, mitochondrial contigs were readily identified in 26 of 43 SAGs (Table S5).  
170 Although mitochondrial contigs remained fragmented in most SAGs, four complete or near-complete  
171 mitochondrial genomes were recovered with coding content near-identical to the published mitochondrial  
172 genome from picozoa MS5584-11<sup>19</sup> (Fig S9). The ability to assemble complete mitochondrial genomes from the  
173 SAGs suggests that the partial nature of the data does not specifically hinder organelle genome recovery if  
174 present, at least in the case of mitochondria<sup>20</sup>.

175 Second, we investigated the possibility that the plastid genome was lost while the organelle itself has been  
176 retained—as is the case for *Rhodolphis*<sup>5</sup>. For this, we reconstructed phylogenetic trees for several essential  
177 nuclear-encoded biochemical plastid pathways derived by endosymbiotic gene transfer (EGT) that were shown  
178 to be at least partially retained even in cryptic plastids<sup>5,21,22</sup>. These included genes involved in the biosynthesis of  
179 isoprenoids (ispD,E,F,G,H, dxr, dxs), fatty acids (fabD,F,G,H,I,Z, ACC), heme (hemB,D,E,F,H,Y, ALAS), and  
180 iron-sulfur clusters (sufB,C,D,E,S, NifU, iscA; see also Table S6). In all cases, the picozoan homologues  
181 grouped either with bacteria—but not cyanobacteria, suggesting contamination—or the mitochondrial/nuclear  
182 copies of host origin. Furthermore, none of the picozoan homologues contained predicted N-terminal plastid  
183 transit peptides. We also searched for picozoan homologues of all additional proteins (n=62) that were predicted  
184 to be targeted to the cryptic plastid in rhodelphids<sup>5</sup>. This search resulted in one protein (Arogenate  
185 dehydrogenase, OG0000831) with picozoan homologues that were closely related to red algae and belonged to a  
186 larger clade with host-derived plastid targeted plant sequences, but neither the picozoan nor the red algal  
187 sequences displayed predicted transit peptides. Finally, to eliminate the possibility of missing sequences because  
188 of errors during the assembly and gene prediction, we additionally searched the raw read sequences for the same  
189 plastid-targeted or plastid transport machinery genes, which revealed no obvious candidates. In contrast, we  
190 readily identified mitochondrial genes (e.g. homologues of the mitochondrial import machinery from the  
191 TIM17/TIM22 family), which further strengthened our inference that the single-cell data are in principle  
192 adequate to identify organellar components, when they are present.

193 The lack of cryptic plastids in diverse modern-day picozoans does not preclude photosynthetic ancestry if the  
194 plastid was lost early in the evolution of the group. To assess this possibility, we searched more widely for  
195 evidence of a cyanobacterial footprint on the nuclear genome that would rise above a background of horizontal  
196 gene transfers for proteins functioning in cellular compartments other than the plastids. The presence of a  
197 significant number of such proteins may be evidence for a plastid-bearing ancestor. We clustered proteins from



198 419 genomes, including all major eukaryotic groups as well as a selection of bacteria into orthologous groups  
199 (OGs) (Table S7). We built phylogenies for OGs that contained at least cyanobacterial and algal sequences, as  
200 well as a sequence from one of 33 focal taxa, including Picozoa, a range of photosynthetic taxa, but also non-  
201 photosynthetic plastid-containing, and plastid-lacking taxa to be used as controls. Putative gene transfers from  
202 cyanobacteria (EGT) were identified as a group of plastid-bearing eukaryotes that included sequences from the  
203 focal taxa and branched sister to a clade of cyanobacteria. We allowed up to 10% of sequences from groups with  
204 no plastid ancestry. This approach identified 16 putative EGTs for Picozoa where at least 2 different SAGs/CO-  
205 SAGs grouped together, compared to between 89–313 EGTs for photosynthetic species, and up to 59 EGTs for  
206 species with non-photosynthetic plastids (Fig 3a). At the other end of the spectrum for species with non-  
207 photosynthetic plastids, we observed that the number of inferred cyanobacterial genes for e.g. rhodelphids (14)  
208 or *Paraphysomonas* (12) was comparable to Picozoa (16) or other, plastid-lacking taxa such as *Telonema* (15) or  
209 *Goniomonas* (18). In order to differentiate these putative endosymbiotic transfers from a background of bacterial  
210 transfers (or bacterial contamination), we next attempted to normalise the EGT signal by estimating an extended  
211 bacterial signal (indicative of putative HGT: horizontal gene transfers) using the same tree sorting procedure  
212 (Fig S10). When comparing the number of inferred EGT with that of inferred HGT, we found a marked  
213 difference between plastid-containing (including non-photosynthetic) and plastid-lacking lineages. While all  
214 plastid-containing taxa—with the notable exception of *Rhodelphis*—showed a ratio of EGT to HGT above 1, all  
215 species without plastid ancestry and *Hematodinium*, one of the few taxa with reported plastid loss, as well as  
216 *Rhodelphis* and Picozoa showed a much higher number of inferred HGT than EGT.

217

## 218 Discussion

219 The 17 SAGs and CO-SAGs of Picozoa obtained in this study provide robust data for phylogenomic analyses of  
220 this important phylum of eukaryotes. With this data, we are able to firmly place Picozoa within the supergroup  
221 Archaeplastida, most likely as a sister lineage to red algae and rhodelphids. Archaeplastids contain all known  
222 lineages with primary plastids (with the exception of *Paulinella*), which are widely viewed to be derived from a  
223 single primary endosymbiosis with a cyanobacterium. This notion of a common origin of primary plastids is  
224 supported by cellular and genomic data (see<sup>23,24</sup> and references therein for review), as well as plastid  
225 phylogenetics<sup>25,26</sup>. The phylogenetic support for Archaeplastida based on host (nuclear) data has been less  
226 certain<sup>7,8,27</sup>, but our analysis is consistent with recent reports that have also recovered a monophyletic origin—  
227 here including Picozoa—when using gene and taxon-rich phylogenomic datasets<sup>1,9,10</sup>. This position has  
228 important implications for our understanding of plastid origins because, in contrast to all other archaeplastids  
229 known to date, our results indicate that Picozoa lack plastids and plastid-associated EGTs. The lack of plastid in  
230 Picozoa was also inferred based on smaller initial SAG data<sup>11</sup> as well as ultrastructural observation of *P.*

231 *judraskeda*<sup>14</sup>. Two main possible hypotheses exist to explain the lack of plastids in Picozoa: that this group was  
232 never photosynthetic, or complete plastid loss occurred early in their evolution.

233 To suggest that Picozoa was never photosynthetic requires that the current distribution of primary plastids is due  
234 to multiple independent endosymbioses, specifically that red algae arose from a separate primary endosymbiosis  
235 from that leading to green algae and glaucophytes. This scenario would have involved the endosymbioses of  
236 closely related cyanobacterial lineages in closely related hosts to explain the many similarities between primary  
237 plastids<sup>24</sup>. Although this may sound unlikely, there is accumulating evidence that similar plastids were derived  
238 independently from similar endosymbionts in closely related hosts in dinoflagellates with tertiary plastids<sup>28–30</sup>,  
239 and has been argued before for primary plastids<sup>31–34</sup>. However, the current bulk of cell and molecular evidence  
240 suggests that multiple independent origins of primary plastids are unlikely, including several features of plastid  
241 biology that are not present in cyanobacteria (e.g., protein targeting systems, light-harvesting complex proteins,  
242 or plastid genome architecture)<sup>23,24,35</sup>. A related explanation could involve a secondary endosymbiosis where the  
243 plastid in red algae, for example, was secondarily acquired from a green alga<sup>36</sup>. This latter scenario would be  
244 made unlikely by the identification of host-derived plastid components shared between all archaeplastid lineages.

245 The second hypothesis implies that a common ancestor of Picozoa entirely lost its primary plastid. The  
246 possibility of plastid loss in a free-living lineage like Picozoa would be unprecedented because to date, the only  
247 known unambiguous cases of total plastid loss all come from parasitic lineages (all in myxozoan alveolates: in  
248 *Cryptosporidium*<sup>37</sup>, certain gregarines<sup>22,38</sup>, and the dinoflagellate *Hematodinium*<sup>39</sup>). To evaluate this possibility,  
249 we searched our data for a cyanobacterial footprint in the nuclear genome that would result from an ancestral  
250 endosymbiosis. The transfer of genes from endosymbiont to host nucleus via EGT, and the targeting of the  
251 product of some or all of these genes back to the plastids, are recognised as a hallmark of organelle  
252 integration<sup>40,41</sup>. EGT has occurred in all algae, although its impact on nuclear genomes can vary and the  
253 inference of EGT versus other horizontally acquired genes (HGT) can be difficult to decipher for ancient  
254 endosymbioses<sup>42–46</sup>. Our analysis of the normalised cyanobacterial signal in Picozoa, which we used as a proxy  
255 for quantifying EGT, provides no clear evidence for the existence of a plastid-bearing ancestor. However, it  
256 should be noted that evaluating the possibility of plastid loss in groups where a photosynthetic ancestry is not  
257 confirmed—such as Picozoa—is complicated because there is no baseline for the surviving footprint of  
258 endosymbiosis following plastid loss. Notably, we found no significant difference in the number of inferred  
259 EGTs in Picozoa compared to lineages with demonstrated plastid loss (e.g. *Hematodinium* with 10 inferred  
260 EGT), lineages with non-photosynthetic plastids (e.g. *Rhodolphis*: 14 inferred EGT), or with no photosynthetic  
261 ancestry (e.g. *Telonema*: 15 inferred EGT).

262 The lack of a genomic baseline to assess plastid loss in Picozoa is further complicated by limitations of our data  
263 and methods. The partial nature of eukaryotic SAGs makes it possible that EGTs are absent from our data, even  
264 with >90% of inferred genomic completeness. Additionally, the possibility exists that the number of EGT might



265 have always been low during the evolution of the group, even if a plastid was once present. Recent  
266 endosymbioses where EGT can be pinpointed with precision showed a relatively low frequency. For example,  
267 they represent at most a few percent of the chromatophore proteome in *Paulinella*<sup>47</sup>, or as few as 9 genes in  
268 tertiary endosymbiosis in dinoflagellates<sup>48</sup>. Thus, it is possible that the much higher number of EGT inferred in  
269 red algae (e.g. 168 in *Galdieria*) occurred after the divergence of Picozoa, and that Picozoa quickly lost its  
270 plastid before more EGT occurred. An observation that supports this hypothesis is the low number of putative  
271 EGTs found in *Rhodolphis* (14), suggesting that the bulk of endosymbiotic transfers in red algae may have  
272 happen after their divergence from rhodelphids.

273

## 274 **Conclusion**

275 In this study, we used single-cell genomics to demonstrate that Picozoa are a plastid lacking major lineage of  
276 archaeplastids. This is the first example of an archaeplastid lineage without plastids, which can be interpreted as  
277 either plastid loss, or evidence of independent endosymbiosis in the ancestor of red algae and rhodelphids. Under  
278 the most widely accepted scenario of a single plastid origin in Archaeplastida, Picozoa would represent the first  
279 known case of plastid loss in this group, but also more generally in any free-living species. In order to  
280 discriminate plastid loss from multiple plastid gains in the early archaeplastid evolution, and more generally  
281 during the evolution of secondary or tertiary plastids, a better understanding of the early steps of plastid  
282 integration is required. In the recently evolved primary plastid-like chromatophores of *Paulinella*, the transfer of  
283 endosymbiotic genes at the onset of the integration was shown to be minimal<sup>4</sup>. Similar examples of integrated  
284 plastid endosymbionts but with apparently very few EGTs are known in dinoflagellates<sup>48,49</sup>. Therefore, new  
285 important clues to decipher the origin of plastids will likely come from a better understanding of the role of the  
286 host in driving these endosymbioses, and crucially the establishment of a more complete framework for  
287 archaeplastid evolution with the search and characterization of novel diversity of lineages without plastids. The  
288 fact that this lineage has never been successfully maintained in culture, with just one study achieving transient  
289 culture<sup>14</sup>, might indicate a lifestyle involving close association with other organisms (such as symbiosis) and  
290 further underscores the enigma of picozoan biology, the lack of information on which hinders our interpretation  
291 of their evolution.

292

## 293 **Material and Methods**

### 294 *Cell Isolation, Identification, and genome amplification*

295 *Baltic Sea.* Surface (depth: up to 2 m) marine water was collected from the Linnaeus microbial Observatory  
296 (LMO) in the Baltic Sea located at 56°N 55.85' and 17°E 03.64' on two occasions: 2 May 2018 (6.1°C and 6.8  
297 ppt salinity) and 3 April 2018 (2.4°C and 6.7 ppt salinity). The samples were transported to the laboratory and

298 filter-fractionized (see Table 1 for detailed sample information). The size fractions larger than 2  $\mu\text{m}$  were  
299 discarded whereas the fraction collected on 0.2  $\mu\text{m}$  filters was resuspended in 2 mL of the filtrate. The obtained  
300 samples were used for fluorescence-activated cell sorting (FACS). Aliquots of 4  $\mu\text{L}$  of 1 mM Mitotracker Green  
301 FM (ThermoFisher) stock solution were added to the samples and were kept in the dark at 15°C for 15–20  
302 minutes. Then the cells were sorted into empty 96-well plates using MoFlo Astrios EQ cell sorter (Beckman  
303 Coulter). Gates were set mainly based on Mitotracker intensity and the dye was detected by a 488 nm and 640  
304 nm laser for excitation, 100  $\mu\text{m}$  nozzle, sheath pressure of 25 psi and 0.1  $\mu\text{m}$  sterile filtered 1 x PBS as sheath  
305 fluid. The region with the highest green fluorescence and forward scatter contained the target group and was  
306 thereafter used alongside with exclusion of red autofluorescence.

307 The SAGs were generated in each well with REPLI-g® Single Cell kit (Qiagen) following the manufacturer's  
308 recommendations but scaled down to 5  $\mu\text{l}$  reactions. Since the cells were sorted in dry plates, 400 nl of 1xPBS  
309 was added prior to 300 nl of lysis buffer D2 for 10 min at 65°C and 10 min on ice, followed by 300 nl stop  
310 solution. The PBS, reagent D2, stop solution, water, and reagent tubes were UV-treated at 2 Joules before use. A  
311 final concentration of 0.5  $\mu\text{M}$  SYTO 13 (Invitrogen) was added to the MDA mastermix. The reaction was run at  
312 30°C for 6 h followed by inactivation at 65°C for 5 min and was monitored by detection of SYTO13  
313 fluorescence every 15 minutes using a FLUOstar® Omega plate reader (BMG Labtech, Germany). The single  
314 amplified genome (SAG) DNA was stored at -20°C until further PCR screening. The obtained products were  
315 PCR-screened using Pico-PCR approach, as described in<sup>14</sup> and the wells showing signal for Picozoa were  
316 selected for sequencing.

317

318 *Eastern North Pacific*. Seawater was collected and sorted using a BD InFlux Fluorescently Activated Cell Sorter  
319 (FACS) on three independent cruises in the eastern North Pacific. The instrument was equipped with a 100 mW  
320 488 nm laser and a 100 mW 355 nm laser and run using sterile nuclease-free 1× PBS as sheath fluid. The  
321 stations where sorting occurred were located at 36.748°N, 122.013°W (Station M1; 20 m, 2 April 2014 and 10  
322 m, 5 May 2014); 36.695°N, 122.357°W (Station M2, 10 m, 5 May 2014); and 36.126°N, 123.49°W (Station 67-  
323 70, 20 m 15 October 2013). Water was collected using Niskin bottles mounted on a CTD rosette. Prior to sorting  
324 samples were concentrated by gravity over a 0.8  $\mu\text{m}$  Supor filter. Two different stains were used: LysoSensor (2  
325 April 2014, M1) and LysoTracker (5 May 2014, M1; 15 October 2013, 67-70), or both together (5 May 2014,  
326 M2). Selection of eukaryotic cells stained with LysoTracker Green DND-26 (Life Technologies; final  
327 concentration, 25 nM) was based on scatter parameters, positive green fluorescence (520/35 nm bandpass), as  
328 compared to unstained samples, and exclusion of known phytoplankton populations, as discriminated by their  
329 forward angle light scatter and red (chlorophyll-derived) autofluorescence (i.e., 692/40 nm bandpass) under 488  
330 nm excitation, similar to methods in<sup>50</sup>. Likewise, selection of cells stained with LysoSensor Blue DND-167 (Life  
331 Technologies; final concentration, 1  $\mu\text{M}$ ), a ratiometric probe sensitive to intracellular *pH* levels, e.g. in  
332 lysosomes, was based on scatter parameters, positive blue fluorescence (435/40 nm bandpass), as compared to  
333 unstained samples, and exclusion of known phytoplankton populations, as discriminated by their forward angle

334 light scatter and red (chlorophyll-derived) autofluorescence (i.e., 692/40 nm bandpass filter) under 355 nm  
335 excitation. For sorts using both stains, all of the above criteria, and excitation with both lasers (with emissions  
336 collected through different pinholes and filter sets), were applied to select cells. Before each sort was initiated,  
337 the respective plate was illuminated with UV irradiation for 2 min. Cells were sorted into 96- or 384-well plates  
338 using the Single-Cell sorting mode from the BD FACS Software v1.0.0.650. A subset of wells was left empty or  
339 received 20 cells for negative and positive controls, respectively. After sorting, the plates were covered with  
340 sterile, nuclease free foil and frozen at -80 °C immediately after completion.

341 Whole genome amplification of individual sorted cells followed methods outlined in<sup>50</sup>. For initial screening,  
342 18S rRNA gene amplicons were amplified from each well using the Illumina adapted TAREuk454FWD1 and  
343 TAREukREV3 primers targeting the V4 hypervariable region. PCR reactions contained 10 ng of template  
344 DNA and 1X 5PRIME HotMasterMix (Quanta Biosciences) as well as 0.4 mg ml<sup>-1</sup> BSA (NEB) and 0.4 μM of  
345 each primer. PCR reactions entailed: 94 °C for 3 min; and 30 cycles at 94 °C for 45 sec, 50 °C for 60 sec and  
346 72 °C for 90 sec; with a final extension at 72 °C for 10 min. Triplicate reactions per cell were pooled prior to  
347 Paired-end (PE) library sequencing (2 × 300 bp) and the resulting 18S V4 rRNA gene amplicons were  
348 trimmed at Phred quality (Q) of 25 using a 10 bp running window using Sickle 1.33  
349 (<https://github.com/najoshi/sickle>). Paired-end reads were merged using USEARCH v.9.0.2132 when reads  
350 had a ≥40 bp overlap with max 5% mismatch. Merged reads were filtered to remove reads with maximum  
351 error rate >0.001 or <200 bp length. Sequences with exact match to both primers were retained, primer  
352 sequences were trimmed using Cutadapt v.1.13<sup>51</sup>, and the remaining sequences were *de novo* clustered at 99%  
353 sequence similarity by UCLUST forming operational taxonomic units (OTUs). Each of the cells further  
354 sequenced had a single abundant OTU that was taxonomically identified using BLASTn in GenBank's nr  
355 database.

356

### 357 *Sequencing*

358 Sequencing libraries were prepared from 100 ng DNA using the TruSeq Nano DNA sample preparation kit (cat#  
359 20015964/5, Illumina Inc.) targeting an insert size of 350bp. For six samples, less than 100ng was used (between  
360 87 ng-97 ng). The library preparations were performed by SNP&SEQ Technology Platform at Uppsala  
361 University according to the manufacturers' instructions. All samples were then multiplexed on one lane of an  
362 Illumina HiSeqX instrument with 150 cycles paired-end sequencing using the v2.5 sequencing chemistry,  
363 producing between 10,000 and 30,000,000 read pairs.

364

## 365 *Genome Assembly and 18S rRNA gene analysis*

366 The 43 Illumina datasets were trimmed using *Trim Galore* v0.6.1  
367 ([https://www.bioinformatics.babraham.ac.uk/projects/trim\\_galore/](https://www.bioinformatics.babraham.ac.uk/projects/trim_galore/)) with default parameter and assembled into  
368 genomic contigs with SPAdes v3.13.0<sup>52</sup> in single-cell mode (--sc --careful -k 21,33,55,99). Open reading frames  
369 (ORFs) were identified and translated using Prodigal v2.6.3 in ‘anonymous’ mode<sup>53</sup> and rRNA genes were  
370 predicted using barrnap v0.9 (<https://github.com/tseemann/barrnap>) for eukaryotes. All 18S rRNA gene  
371 sequences were, together with available reference sequences from the protist ribosomal reference database  
372 (PR2), aligned with MAFFT E-INS-i v7.429<sup>54</sup> and trimmed with trimal<sup>55</sup> (gap threshold 0.01%). After  
373 performing a modeltest using ModelFinder<sup>56</sup> (best model: GTR+R6+F), a phylogenetic tree was reconstructed in  
374 IQ-TREE v2.1.1<sup>57</sup> with 1000 ultrafast bootstrap replicates (see Fig S11 for a tree with extended taxon sampling).  
375 Additionally, we estimated the average nucleotide identity (ANI) for all pairs of SAGs using fastANI v1.2<sup>58</sup> (Fig  
376 S12). Based on the 18S rRNA gene tree and the ANI value, groups of closely related SAGs with almost identical  
377 18S rRNA gene sequences (sequence similarity above 99%) were identified for co-assembly. Co-assemblies  
378 were generated in the same way as described above for single assemblies, pooling sequencing libraries from  
379 closely related single cells. ORFs and rRNA genes were similarly extracted from the co-assemblies. The  
380 completeness of the SAGs and CO-SAGs was then assessed using BUSCO v4.1.3<sup>15</sup> with 255 markers for  
381 eukaryotes (Fig S13) as well as using the 320 marker phylogenomic dataset as described below. General genome  
382 characteristics were computed with QUAST v5.0.2<sup>59</sup>. Alignments were reconstructed for the 18S rRNA genes  
383 from the co-assemblies and those SAGs not included in any CO-SAG together with PR2 references for cryptists  
384 and katablepharids (the closest groups to Picozoa in 18S rRNA gene phylogenies) in the same way as described  
385 above. The tree was reconstructed using GTR+R4+F after model selection and support was assessed with 100  
386 non-parametric bootstraps. The six CO-SAGs and the 11 individual SAGs were used in all subsequent analyses.

387 For each of these 17 assemblies we estimated the amount of prokaryotic/viral contamination by comparing the  
388 predicted proteins against the NCBI nr database using DIAMOND in blastp mode<sup>60</sup>. If at least 60% of all  
389 proteins from a contig produced significant hits only to sequences annotated as prokaryotic or viral, we  
390 considered that contig to be a putative contamination. In general only a small fraction of each assembly was  
391 found to be such a contamination (Fig S14).

392

## 393 *Phylogenomics*

394 Existing untrimmed alignments for 320 genes and 763 taxa from<sup>1</sup> were used to create HMM profiles in HMMER  
395 v3.2.1<sup>61</sup>, which were then used to identify homologous sequences in the protein sequences predicted from the  
396 Picozoa assemblies (or co-assemblies) as well as in 20 additional, recently sequenced eukaryotic genomes and  
397 transcriptomes (Table S2). Each single gene dataset was filtered using PREQUAL v1.02<sup>62</sup> to remove non-  
398 homologous residues prior to alignment, aligned using MAFFT E-INS-i, and filtered with Divvier -partial v1.0<sup>63</sup>.

399 Alignments were then used to reconstruct gene trees with IQ-TREE (-mset LG, LG4X; 1000 ultrafast bootstraps  
400 with the BNNI optimization). All trees were manually scrutinized to identify contamination and paralogs. These  
401 steps were repeated at least two times, until no further contaminations or paralogs could be detected. We  
402 excluded three genes that showed ambiguous groupings of Picozoa or rhodelphids in different parts of the trees.  
403 From this full dataset of 317 genes and 794 taxa, we created a concatenated supermatrix alignment using the  
404 cleaned alignments described above. This supermatrix was used to reconstruct a tree in IQ-TREE with the model  
405 LG+G+F and ultrafast bootstraps (1000 UFBoots) estimation with the BNNI improvement.

406 We then prepared a reduced dataset with a more focused taxon sampling of 67 taxa, covering all major  
407 eukaryotic lineages but focussing on the groups for which an affiliation to Picozoa had been reported previously.  
408 For this dataset, closely related species were merged into OTUs in some cases in order to decrease the amount of  
409 missing data per taxon (Table S3). The 317 single gene datasets were re-aligned using MAFFT E-INS-i, filtered  
410 using both Divvier -partial and BMGE (-g 0.2 -b 10 -m BLOSUM75) and concatenated into two supermatrices.  
411 Model selection of mixture models was performed using ModelFinder<sup>56</sup> for both datasets, and in both cases  
412 LG+C60+G+F was selected as the best-fitting model. Trees for both datasets were reconstructed using the  
413 Posterior Mean Site Frequency (PMSF)<sup>64</sup> approximation of this mixture model in IQ-TREE and support was  
414 assessed with 100 non-parametric bootstraps (see Fig S15 for the Divvier derived tree)

415 In addition, we reconstructed a phylogenetic tree using the supermatrix alignment based on BMGE trimming in  
416 PhyloBayes MPI v1.8<sup>65</sup> using the CAT+GTR+G model. We ran three independent chains for 3600 cycles, with  
417 the initial 1500 cycles being removed as burnin from each chain. We then generated a consensus tree using the  
418 bpcmp program of PhyloBayes. Partial convergence was achieved between chains 1 and 2 with a maxdiff value  
419 of 0.26 (Fig S16). The third chain differed only in the position of haptists and *Ancoracysta twisti*, but not in the  
420 relationships within Archaeplastida and the position of Picozoa (Fig S17).

421 In order to test the robustness of our results we additionally performed a fast-site removal analysis<sup>66</sup>, iteratively  
422 removing the 5000 fastest evolving sites (up to a total of 55000 removed sites). For each of these 11 alignments,  
423 we reconstructed an ML tree using the model LG+C60+G+F in IQ-TREE with ultrafast bootstraps (1000  
424 UFBoots) and evaluated the support for the branching of Picozoa with rhodelphids and red algae as well as for  
425 other groupings (Fig S4). We also performed trimming of the 25% and 50% most heterogeneous sites based on  
426 the  $\chi^2$  metric<sup>67</sup> and performed tree reconstruction using the same model as above (Fig S5, Fig S7). We also  
427 prepared a supermatrix alignment (BMGE trimmed) from 224 genes with at least two Picozoa sequences in the  
428 final dataset and performed similar tree reconstruction (model LG+C60+G+F in IQ-TREE with 1000 ultrafast  
429 bootstraps, Fig S8).

430 Furthermore, we performed a supertree-based phylogenetic reconstruction using ASTRAL-III v5.7.3<sup>68</sup>. We  
431 reconstructed gene trees for each of the 317 alignments of the 67-taxon dataset using IQ-TREE (-m TEST -mset



432 LG -mrate G,R4 -madd LG4X,LG4X+F,LG4M,LG4M+F, using 1000 ultrafast bootstraps) and performed multi-  
433 locus bootstrapping based on the bootstrap replicates (option -b in ASTRAL-III) (Fig S6).

434 Finally, we performed an approximately unbiased (AU) test in IQ-TREE of 15 topologies (see Table S4),  
435 including previously recovered positions of Picozoa (as sister to red algae, cryptists, telonemids, Archaeplastida  
436 etc.).

437

#### 438 *Mitochondrial contig identification and annotation*

439

440 Using the published picozoan mitochondrial genome (Picozoa sp. MS584-11: MG202007.1 from<sup>19</sup>), BLAST  
441 searches were performed on a dedicated sequenceServer<sup>69</sup> to identify mitochondrial contigs in the 43 picozoan  
442 SAGs. Putative mitochondrial contigs were annotated using the MFannot server  
443 (<https://megasun.bch.umontreal.ca/cgi-bin/mfannot/mfannotInterface.pl>). All contigs with predicted  
444 mitochondrial genes or whose top hits in the NCBI nr database was the published picozoan mitochondrial  
445 genome (MG202007.1) were considered to be *bona fide* mitochondrial contigs and retained (Supplementary  
446 materials). Manual annotation was conducted as needed.

447

#### 448 *Plastid Genes & EGT*

449 GetOrganelle v1.7.1<sup>70</sup> was used to identify organellar genomes. We searched the assemblies for putative plastid  
450 contigs with the subcommand 'get\_organelle\_from\_assembly.py -F embplant\_pt,other\_pt', while we attempted  
451 to assemble such a genome directly using the command 'get\_organelle\_from\_reads.py -R 30 -k 21,45,65,85,105  
452 -F embplant\_pt,other\_pt'. We additionally searched the predicted proteins against available plastid protein  
453 sequences from ncbi using DIAMOND v2.0.6<sup>60</sup> in blastp mode (--more-sensitive). Contigs that were identified  
454 as putatively coming from a plastid genome were then checked manually by doing BLAST searches against NT,  
455 and contigs that showed similarity only to bacterial genomes or to the picozoa mitochondrial assembly  
456 MG202007.1 were rejected.

457 To search for known plastid pathways, we prepared Hidden Markov model (HMM) profiles for 32 gene  
458 alignments that were shown to be retained in lineages with non-photosynthetic plastids and included a wide  
459 diversity of plastid-bearing eukaryotes following a similar approach as in<sup>22</sup>. Using these profiles, we identified  
460 homologues in the Picozoa SAGs, and aligned them together with the initial sequences used to create the profiles  
461 using MAFFT E-INS-i. We trimmed the alignments using trimAl v1.4.rev15 '-gt 0.05' and reconstructed  
462 phylogenetic trees using IQ-TREE (-m LG4X; 1000 ultrafast bootstraps with the BNNI optimization) from these  
463 alignments. We then manually inspected the trees to assess whether picozoan sequences grouped with known  
464 plastid-bearing lineages. We additionally used the sequences from these core plastid genes to search the raw  
465 sequencing reads for any signs of homologues that could have been missed in the assemblies. We used the tool



466 PhyloMagnet<sup>71</sup> to recruit reads and perform gene-centric assembly of these genes<sup>72</sup>. The assembled genes were  
467 then compared to the NR database using DIAMOND in blastp mode (--more-sensitive --top 10).

468 To identify putative EGT, we prepared orthologous clusters for 419 species (128 bacteria and 291 eukaryotes)  
469 with a focus on plastid-bearing eukaryotes and cyanobacteria, but also including other eukaryotes and bacteria,  
470 using OrthoFinder v2.4.0<sup>73</sup>. For Picozoa and a selection of 32 photosynthetic or heterotrophic lineages (Table  
471 S8), we inferred trees for 2626 clusters that contained the species under consideration, at least one cyanobacterial  
472 sequence, and at least one archaeplastid sequence of red algae, green algae or plants. Alignments for these  
473 clusters were generated with MAFFT E-INS-i, filtered using trimAl '-gt 0.01' and phylogenetic trees were  
474 reconstructed using IQ-TREE (-m LG4X; 1000 ultrafast bootstraps with the BNNI optimization). We then  
475 identified trees where the target species grouped with other plastid-bearing lineages (allowing up to 10% non-  
476 plastid sequences) and sister at least two cyanobacterial sequences. For Picozoa, we added the condition that  
477 sequences from at least two SAG/COSAG assemblies must be monophyletic. For species with no known plastid  
478 ancestry such as *Rattus* or *Phytophthora*, putative EGTs can be interpreted as false positives due to  
479 contamination, poor tree resolution or other mechanisms, since we expect no EGTs from cyanobacteria to be  
480 present at all in these species. This rough estimate of the expected false positive rate for this approach can give  
481 us a baseline of false positives that can be expected for picozoa as well.

482 To put the number of putative EGTs into relation to the overall amount of gene transfers, we applied a very  
483 similar approach to the one described above for detecting putative HGT events. We prepared additional trees (in  
484 the same way as described for the detection of EGTs) for clusters that contained the taxon of interest and non-  
485 cyanobacterial bacteria and identified clades of the taxon under consideration (including a larger taxonomic  
486 group, e.g. Streptophyta for *Arabidopsis* or Metazoa for *Rattus*) that branched sister to a bacterial clade.

487

#### 488 *Distribution of Picozoa in Tara Oceans*

489 We screened available OTUs that were obtained from V9 18S rRNA gene eukaryotic amplicon data generated  
490 by *Tara Oceans*<sup>17</sup> for sequences related to Picozoa. Using the V9 region of the 18S rRNA gene sequences from  
491 the 17 Picozoa assemblies as well as from the picozoan PR2 references used to reconstruct the 18S rRNA gene  
492 tree described above, we applied VSEARCH v2.15.1<sup>74</sup> (--usearch\_global -iddef 1 --id 0.90) to find all OTUs  
493 with at least 90 % similar V9 regions to any of these reference picozoan sequences. Using the relative abundance  
494 information available for each *Tara Oceans* sampling location, we then computed the sum for all identified  
495 Picozoa OTUs per station and plotted the relative abundance on a world map.

496

## 497 **Acknowledgments**

498 This work was supported by a grant from Science for Life Laboratory available to FB and a scholarship from  
499 Carl Tryggers Stiftelse to VZ (PI: FB). TJGE thanks the European Research Council (ERC consolidator grant  
500 817834); the Dutch Research Council (NWO-VICI grant VI.C.192.016); Moore–Simons Project on the Origin of  
501 the Eukaryotic Cell (Simons Foundation 735925LPI, <https://doi.org/10.46714/735925LPI>); and the Marie  
502 Skłodowska-Curie ITN project SINGEK (H2020-MSCA-ITN-2015-675752) which provided funding for MES.  
503 PJK and VM were funded by an Investigator Grant from the Gordon and Betty Moore Foundation  
504 (<https://doi.org/10.37807/GBMF9201>). The Pacific Ocean work was supported by GBMF3788 to AZW.  
505 Sampling at the LMO station in the Baltic Sea was carried out by support from the Swedish Research Council  
506 VR and the marine strategic research program EcoChange to JP. Sequencing was performed by the SNP&SEQ  
507 Technology Platform in Uppsala, part of the National Genomics Infrastructure (NGI) Sweden and Science for  
508 Life Laboratory. The SNP&SEQ Platform is also supported by the Swedish Research Council and the Knut and  
509 Alice Wallenberg Foundation. Cell sorting and whole genome amplification was performed at the Microbial  
510 Single Cell Genomics Facility (MSCG) at SciLifeLab. Computations were performed on resources provided by  
511 the Swedish National Infrastructure for Computing (SNIC) at Uppsala Multidisciplinary Center for Advanced  
512 Computational Science (UPPMAX) under Projects SNIC 2019/3-305, SNIC 2020/15-58, SNIC 2021/5-50,  
513 Uppstore2018069. Finally, we thank Eunsoo Kim and Sally D. Warring for sharing peptide models from  
514 *Palpitomonas bilix* and *Roombia truncata*.

515

## 516 **Author contributions**

517 FB and JGW conceived the study. For the Baltic samples, VVZ and JP performed sampling and cell sorting;  
518 VVZ and JFHS performed genome amplification & sequencing preparation. For the Pacific samples, CP, SW  
519 and AZW conceived, developed and implemented sort protocols; performed sampling, cell sorting and  
520 sequencing; CP and AZW performed initial sequence analyses and phylogenetics. MES under the supervision of  
521 TJGE and FB performed assembly of SAGs and Co-SAGs, phylogenomic analyses, and searched for plastid  
522 evidence and gene transfers with the help of VM and PJK. RPS and JGW assembled mitochondrial genomes.  
523 MES, FB, and JGW drafted the manuscript. TJGE, PKJ, AZW, JP, VVZ and JFHS contributed edits to the  
524 manuscript. All authors read and approved the final version.

525

## 526 **Code & data availability**

527 All custom scripts used in this study are available at <https://github.com/maxemil/picozoa-scripts> under a MIT  
528 license. All data used for the analyses as well as results files such as contigs and single gene trees are available at  
529 figshare ([10.6084/m9.figshare.c.5388176](https://doi.org/10.6084/m9.figshare.c.5388176)). A sequenceServer BLAST server was set up for the SAG assemblies:

530 <http://evocellbio.com/SAGdb/burki/>. Raw sequencing reads were deposited in the Sequence Read Archive  
531 (SRA) at NCBI under accession PRJNA747736 and will be available upon acceptance.

532

### 533 **References**

534 1. Strassert, J. F. H., Irisarri, I., Williams, T. A. & Burki, F. A molecular timescale for eukaryote evolution with  
535 implications for the origin of red algal-derived plastids. *Nat Commun* 12, 1879 (2021).

536 2. Burki, F., Roger, A. J., Brown, M. W. & Simpson, A. G. B. The New Tree of Eukaryotes. *Trends Ecol Evol*  
537 35, 43–55 (2019).

538 3. Marin, B., Nowack, E. C. M. & Melkonian, M. A Plastid in the Making: Evidence for a Second Primary  
539 Endosymbiosis. *Protist* 156, 425–432 (2005).

540 4. Nowack, E. C. M. & Weber, A. P. M. Genomics-Informed Insights into Endosymbiotic Organelle Evolution  
541 in Photosynthetic Eukaryotes. *Annu Rev Plant Biol* 69, 1–34 (2018).

542 5. Gawryluk, R. M. R. *et al.* Non-photosynthetic predators are sister to red algae. *Nature* 572, 240–243 (2019).

543 6. Li, L. *et al.* The genome of *Prasinoderma coloniale* unveils the existence of a third phylum within green  
544 plants. *Nat Ecol Evol* 4, 1220–1231 (2020).

545 7. Burki, F. *et al.* Untangling the early diversification of eukaryotes: a phylogenomic study of the evolutionary  
546 origins of Centrohelida, Haptophyta and Cryptista. *Proc Royal Soc B Biological Sci* 283, 20152802 (2016).

547 8. Strassert, J. F. H., Jamy, M., Mylnikov, A. P., Tikhonenkov, D. V. & Burki, F. New Phylogenomic Analysis  
548 of the Enigmatic Phylum Telonemia Further Resolves the Eukaryote Tree of Life. *Mol Biol Evol* 36, 757–765  
549 (2019).

550 9. Lax, G. *et al.* Hemimastigophora is a novel supra-kingdom-level lineage of eukaryotes. *Nature* 564, 410–414  
551 (2018).

552 10. Irisarri, I., Strassert, J. F. H. & Burki, F. Phylogenomic Insights into the Origin of Primary Plastids.  
553 *Systematic Biol* syab036- (2021) doi:10.1093/sysbio/syab036.

554 11. Yoon, H. S. *et al.* Single-Cell Genomics Reveals Organismal Interactions in Uncultivated Marine Protists.  
555 *Science* 332, 714–717 (2011).

556 12. Not, F. *et al.* Picobiliphytes: A Marine Picoplanktonic Algal Group with Unknown Affinities to Other  
557 Eukaryotes. *Science* 315, 253–255 (2007).

558 13. Cuvelier, M. L. *et al.* Widespread distribution of a unique marine protistan lineage. *Environ Microbiol* 10,  
559 1621–1634 (2008).

560 14. Seenivasan, R., Sausen, N., Medlin, L. K. & Melkonian, M. *Picomonas judraskeda* Gen. Et Sp. Nov.: The  
561 First Identified Member of the Picozoa Phylum Nov., a Widespread Group of Picoeukaryotes, Formerly Known  
562 as ‘Picobiliphytes.’ *Plos One* 8, e59565 (2013).

- 563 15. Simão, F. A., Waterhouse, R. M., Ioannidis, P., Kriventseva, E. V. & Zdobnov, E. M. BUSCO: assessing  
564 genome assembly and annotation completeness with single-copy orthologs. *Bioinformatics* 31, 3210–3212  
565 (2015).
- 566 16. Moreira, D. & López-García, P. The rise and fall of Picobiliphytes: How assumed autotrophs turned out to be  
567 heterotrophs. *Bioessays* 36, 468–474 (2014).
- 568 17. Vargas, C. de *et al.* Eukaryotic plankton diversity in the sunlit ocean. *Science* 348, 1261605 (2015).
- 569 18. Kim, E. & Graham, L. E. EEF2 Analysis Challenges the Monophyly of Archaeplastida and Chromalveolata.  
570 *Plos One* 3, e2621 (2008).
- 571 19. Janouškovec, J. *et al.* A New Lineage of Eukaryotes Illuminates Early Mitochondrial Genome Reduction.  
572 *Curr Biol* 27, 3717–3724.e5 (2017).
- 573 20. Wideman, J. G. *et al.* Unexpected mitochondrial genome diversity revealed by targeted single-cell genomics  
574 of heterotrophic flagellated protists. *Nat Microbiol* 5, 154–165 (2020).
- 575 21. Dorrell, R. G. *et al.* Principles of plastid reductive evolution illuminated by nonphotosynthetic chrysophytes.  
576 *Proc National Acad Sci* 201819976 (2019) doi:10.1073/pnas.1819976116.
- 577 22. Mathur, V. *et al.* Multiple Independent Origins of Apicomplexan-Like Parasites. *Curr Biol* 29, 2936–2941.e5  
578 (2019).
- 579 23. Reyes-Prieto, A., Weber, A. P. M. & Bhattacharya, D. The Origin and Establishment of the Plastid in Algae  
580 and Plants. *Annu Rev Genet* 41, 147–168 (2007).
- 581 24. Gould, S. B., Waller, R. F. & McFadden, G. I. Plastid Evolution. *Annu Rev Plant Biol* 59, 491–517 (2008).
- 582 25. Shih, P. M. *et al.* Improving the coverage of the cyanobacterial phylum using diversity-driven genome  
583 sequencing. *Proc National Acad Sci* 110, 1053–1058 (2013).
- 584 26. Ponce-Toledo, R. I. *et al.* An Early-Branching Freshwater Cyanobacterium at the Origin of Plastids. *Curr*  
585 *Biol* 27, 386–391 (2017).
- 586 27. Yabuki, A. *et al.* *Palpitomonas bilix* represents a basal cryptist lineage: insight into the character evolution in  
587 Cryptista. *Sci Rep-uk* 4, 4641 (2014).
- 588 28. Hehenberger, E., Gast, R. J. & Keeling, P. J. A kleptoplastidic dinoflagellate and the tipping point between  
589 transient and fully integrated plastid endosymbiosis. *Proc National Acad Sci* 116, 17934–17942 (2019).
- 590 29. Sarai, C. *et al.* Dinoflagellates with relic endosymbiont nuclei as models for elucidating organellogenesis.  
591 *Proc National Acad Sci* 117, 5364–5375 (2020).
- 592 30. Yamada, N., Sakai, H., Onuma, R., Kroth, P. G. & Horiguchi, T. Five Non-motile Dinotom Dinoflagellates  
593 of the Genus *Dinotrix*. *Front Plant Sci* 11, 591050 (2020).
- 594 31. Stiller, J. W., Reel, D. C. & Johnson, J. C. A single origin of plastids revisited: convergent evolution in  
595 organellar genome content. *J Phycol* 39, 95–105 (2003).

- 596 32. Larkum, A. W. D., Lockhart, P. J. & Howe, C. J. Shopping for plastids. *Trends Plant Sci* 12, 189–195  
597 (2007).
- 598 33. Howe, C. J., Barbrook, A. C., Nisbet, R. E. R., Lockhart, P. J. & Larkum, A. W. D. The origin of plastids.  
599 *Philosophical Transactions Royal Soc B Biological Sci* 363, 2675–2685 (2008).
- 600 34. Stiller, J. W. Toward an empirical framework for interpreting plastid evolution. *J Phycol* 50, 462–471  
601 (2014).
- 602 35. Bhattacharya, D., Archibald, J. M., Weber, A. P. M. & Reyes-Prieto, A. How do endosymbionts become  
603 organelles? Understanding early events in plastid evolution. *Bioessays* 29, 1239–1246 (2007).
- 604 36. Kim, E. & Maruyama, S. A contemplation on the secondary origin of green algal and plant plastids. *Acta Soc  
605 Bot Pol* 83, 331–336 (2014).
- 606 37. Zhu, G., Marchewka, M. J. & Keithly, J. S. *Cryptosporidium parvum* appears to lack a plastid genome.  
607 *Microbiology+* 146, 315–321 (2000).
- 608 38. Janouškovec, J. *et al.* Apicomplexan-like parasites are polyphyletic and widely but selectively dependent on  
609 cryptic plastid organelles. *Elife* 8, e49662 (2019).
- 610 39. Gornik, S. G. *et al.* Endosymbiosis undone by stepwise elimination of the plastid in a parasitic dinoflagellate.  
611 *Proc National Acad Sci* 112, 5767–5772 (2015).
- 612 40. Timmis, J. N., Ayliffe, M. A., Huang, C. Y. & Martin, W. Endosymbiotic gene transfer: organelle genomes  
613 forge eukaryotic chromosomes. *Nat Rev Genet* 5, 123–135 (2004).
- 614 41. Archibald, J. M. Genomic perspectives on the birth and spread of plastids. *Proc National Acad Sci* 112,  
615 10147–10153 (2015).
- 616 42. Burki, F. *et al.* Re-evaluating the Green versus Red Signal in Eukaryotes with Secondary Plastid of Red  
617 Algal Origin. *Genome Biol Evol* 4, 626–635 (2012).
- 618 43. Deschamps, P. & Moreira, D. Reevaluating the Green Contribution to Diatom Genomes. *Genome Biol Evol*  
619 4, 683–688 (2012).
- 620 44. Qiu, H., Yoon, H. S. & Bhattacharya, D. Algal endosymbionts as vectors of horizontal gene transfer in  
621 photosynthetic eukaryotes. *Front Plant Sci* 4, 1–8 (2013).
- 622 45. Morozov, A. A. & Galachyants, Y. P. Diatom genes originating from red and green algae: Implications for  
623 the secondary endosymbiosis models. *Mar Genom* 45, 72–78 (2019).
- 624 46. Sibbald, S. J. & Archibald, J. M. Genomic insights into plastid evolution. *Genome Biol Evol* 12, evaa096-  
625 (2020).
- 626 47. Singer, A. *et al.* Massive Protein Import into the Early-Evolutionary-Stage Photosynthetic Organelle of the  
627 *Amoeba Paulinella chromatophora*. *Curr Biol* 27, 2763–2773.e5 (2017).
- 628 48. Burki, F. *et al.* Endosymbiotic gene transfer in tertiary plastid-containing dinoflagellates. *Eukaryot Cell* 13,  
629 246–255 (2014).

- 630 49. Hehenberger, E., Burki, F., Kolisko, M. & Keeling, P. J. Functional Relationship between a Dinoflagellate  
631 Host and Its Diatom Endosymbiont. *Mol Biol Evol* 33, 2376–2390 (2016).
- 632 50. Needham, D. M. *et al.* A distinct lineage of giant viruses brings a rhodopsin photosystem to unicellular  
633 marine predators. *Proc National Acad Sci* 116, 20574–20583 (2019).
- 634 51. Martin, M. Cutadapt removes adapter sequences from high-throughput sequencing reads. *Embnet J* 17, 10–  
635 12 (2011).
- 636 52. Bankevich, A. *et al.* SPAdes: A New Genome Assembly Algorithm and Its Applications to Single-Cell  
637 Sequencing. *J Comput Biol* 19, 455–477 (2012).
- 638 53. Hyatt, D. *et al.* Prodigal: prokaryotic gene recognition and translation initiation site identification. *Bmc*  
639 *Bioinformatics* 11, 119 (2010).
- 640 54. Katoh, K. & Standley, D. M. MAFFT Multiple Sequence Alignment Software Version 7: Improvements in  
641 Performance and Usability. *Mol Biol Evol* 30, 772–780 (2013).
- 642 55. Capella-Gutiérrez, S., Silla-Martínez, J. M. & Gabaldón, T. trimAl: a tool for automated alignment trimming  
643 in large-scale phylogenetic analyses. *Bioinformatics* 25, 1972–1973 (2009).
- 644 56. Kalyaanamoorthy, S., Minh, B. Q., Wong, T. K. F., Haeseler, A. von & Jermini, L. S. ModelFinder: fast  
645 model selection for accurate phylogenetic estimates. *Nat Methods* 14, 587–589 (2017).
- 646 57. Minh, B. Q. *et al.* IQ-TREE 2: New models and efficient methods for phylogenetic inference in the genomic  
647 era. *Mol Biol Evol* 37, 1530–1534 (2020).
- 648 58. Jain, C., Rodriguez-R, L. M., Phillippy, A. M., Konstantinidis, K. T. & Aluru, S. High throughput ANI  
649 analysis of 90K prokaryotic genomes reveals clear species boundaries. *Nat Commun* 9, 5114 (2018).
- 650 59. Gurevich, A., Saveliev, V., Vyahhi, N. & Tesler, G. QUAST: quality assessment tool for genome assemblies.  
651 *Bioinformatics* 29, 1072–1075 (2013).
- 652 60. Buchfink, B., Xie, C. & Huson, D. H. Fast and sensitive protein alignment using DIAMOND. *Nat Methods*  
653 12, 59–60 (2015).
- 654 61. Eddy, S. R. Accelerated Profile HMM Searches. *Plos Comput Biol* 7, e1002195 (2011).
- 655 62. Whelan, S., Irisarri, I. & Burki, F. PREQUAL: detecting non-homologous characters in sets of unaligned  
656 homologous sequences. *Bioinformatics* 34, 3929–3930 (2018).
- 657 63. Ali, R. H., Bogusz, M. & Whelan, S. Identifying Clusters of High Confidence Homologies in Multiple  
658 Sequence Alignments. *Mol Biol Evol* 36, 2340–2351 (2019).
- 659 64. Wang, H.-C., Minh, B. Q., Susko, E. & Roger, A. J. Modeling Site Heterogeneity with Posterior Mean Site  
660 Frequency Profiles Accelerates Accurate Phylogenomic Estimation. *Systematic Biol* 67, 216–235 (2018).
- 661 65. Lartillot, N., Rodrigue, N., Stubbs, D. & Richer, J. PhyloBayes MPI: Phylogenetic Reconstruction with  
662 Infinite Mixtures of Profiles in a Parallel Environment. *Systematic Biol* 62, 611–615 (2013).



- 663 66. Susko, E., Field, C., Blouin, C. & Roger, A. J. Estimation of Rates-Across-Sites Distributions in  
664 Phylogenetic Substitution Models. *Systematic Biol* 52, 594–603 (2003).
- 665 67. Viklund, J., Ettema, T. J. G. & Andersson, S. G. E. Independent Genome Reduction and Phylogenetic  
666 Reclassification of the Oceanic SAR11 Clade. *Mol Biol Evol* 29, 599–615 (2012).
- 667 68. Zhang, C., Rabiee, M., Sayyari, E. & Mirarab, S. ASTRAL-III: polynomial time species tree reconstruction  
668 from partially resolved gene trees. *Bmc Bioinformatics* 19, 153 (2018).
- 669 69. Priyam, A. *et al.* Sequenceserver: a modern graphical user interface for custom BLAST databases. *Mol Biol*  
670 *Evol* 36, 2922–2924 (2019).
- 671 70. Jin, J.-J. *et al.* GetOrganelle: a fast and versatile toolkit for accurate de novo assembly of organelle genomes.  
672 *Genome Biol* 21, 241 (2020).
- 673 71. Schön, M. E., Eme, L. & Ettema, T. J. G. PhyloMagnet: Fast and accurate screening of short-read meta-  
674 omics data using gene-centric phylogenetics. *Bioinformatics* (2019) doi:10.1093/bioinformatics/btz799.
- 675 72. Huson, D. H. *et al.* Fast and simple protein-alignment-guided assembly of orthologous gene families from  
676 microbiome sequencing reads. *Microbiome* 5, 11 (2017).
- 677 73. Emms, D. M. & Kelly, S. OrthoFinder: phylogenetic orthology inference for comparative genomics. *Genome*  
678 *Biol* 20, 238 (2019).
- 679 74. Rognes, T., Flouri, T., Nichols, B., Quince, C. & Mahé, F. VSEARCH: a versatile open source tool for  
680 metagenomics. *Peerj* 4, e2584 (2016).
- 681
- 682

683

## 684 **Figure Legends**

685 **Figure 1. a)** Assembly length in Mbp for 17 SAGs and CO-SAGs used for further analysis. **b)** Estimated  
686 completeness of the 10 most complete SAGs and CO-SAGs as assessed using presence/absence of the BUSCO  
687 dataset of 255 eukaryotic markers and a dataset of 317 Phylogenomic marker genes. These 10 assemblies were  
688 used for the phylogenomic inference. **c)** Maximum likelihood tree of the 18S rRNA gene, reconstructed using  
689 the model GTR+R4+F while support was estimated with 100 non-parametric bootstrap replicates in IQ-TREE.  
690 Picozoa CO-SAGs and SAGs are written in bold, the sequences of *Picomonas judraskeda* and the SAGs from  
691 Yoon et al. (2011)<sup>11</sup> in bold italic. The group labels BP1-3 are from Cuvelier et al. (2008)<sup>13</sup> and deep branching  
692 lineages from Moreira and López-García (2014)<sup>16</sup>.

693

694 **Figure 2.** Maximum likelihood tree of eukaryotic species showing the position of Picozoa. The tree is based on  
695 the concatenated alignment of 317 marker genes and was reconstructed using the site-heterogeneous model  
696 LG+C60+F+G-PMSF. Support values correspond to 100 non-parametric bootstrap replicates/ posterior  
697 probability values estimated using PhyloBayes CAT-GTR-G. Black circles denote full support (=100/1.0).

698

699 **Figure 3. a)** Number of inferred endosymbiotic gene transfers (EGT) across a selection of 33 species that  
700 represent groups with a photosynthetic plastid (green), a non-photosynthetic plastid (blue), confirmed plastid  
701 loss (yellow) and no known plastid ancestry (black). These species serve as a comparison to Picozoa (orange). **b)**  
702 The number of EGTs from a) is related to the number of inferred HGT across the same 33 selected species. A  
703 number below 1 indicates more HGT than EGT, while numbers above 1 indicate more EGT than HGT. No ratio  
704 could be calculated for *Arabidopsis* because there were no detectable HGT events.

705

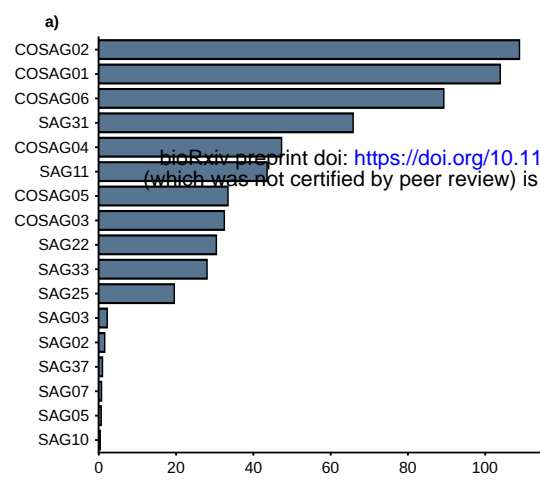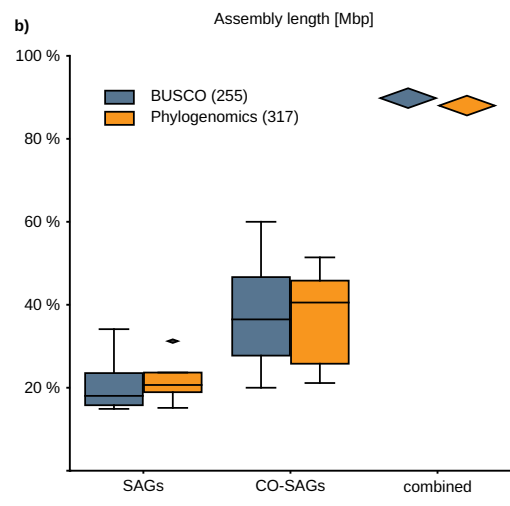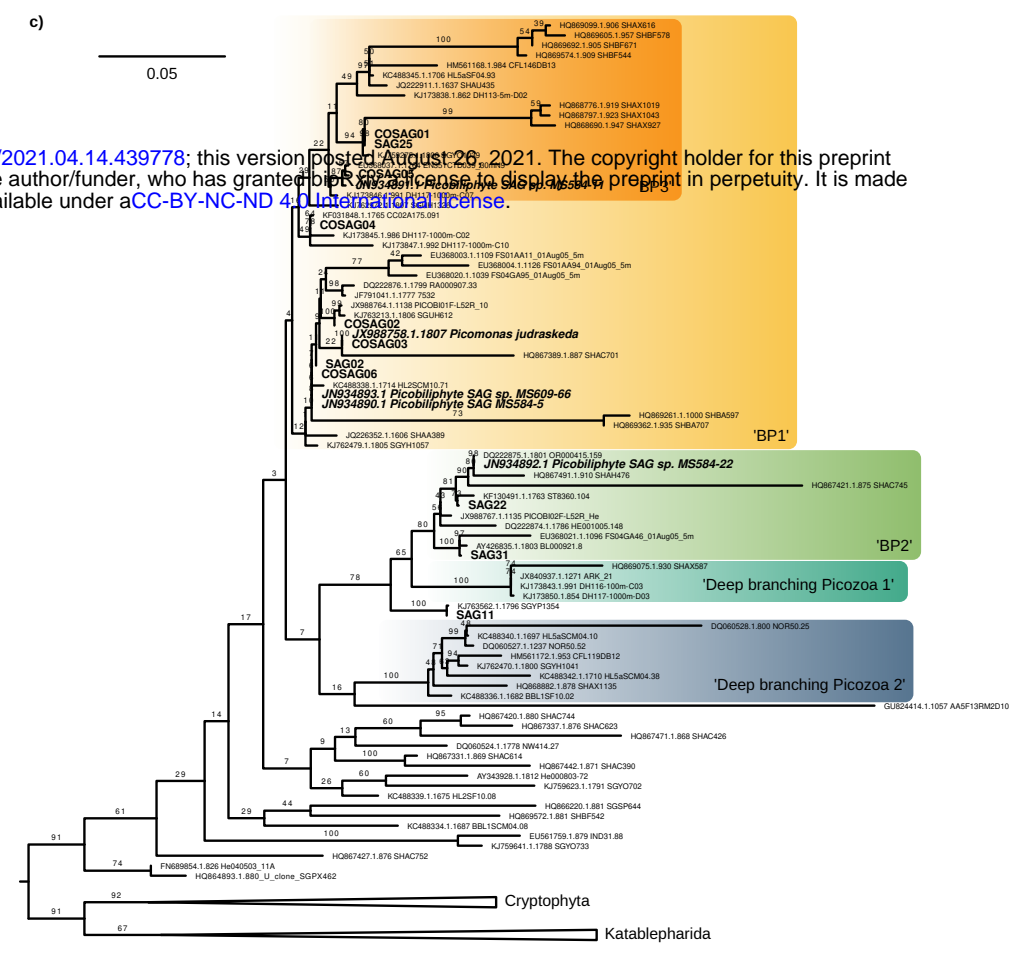

bioRxiv preprint doi: <https://doi.org/10.1101/2021.04.14.439778>; this version posted August 26, 2021. The copyright holder for this preprint (which was not certified by peer review) is the author/funder, who has granted bioRxiv a license to display the preprint in perpetuity. It is made available under aCC-BY-NC-ND 4.0 International license.

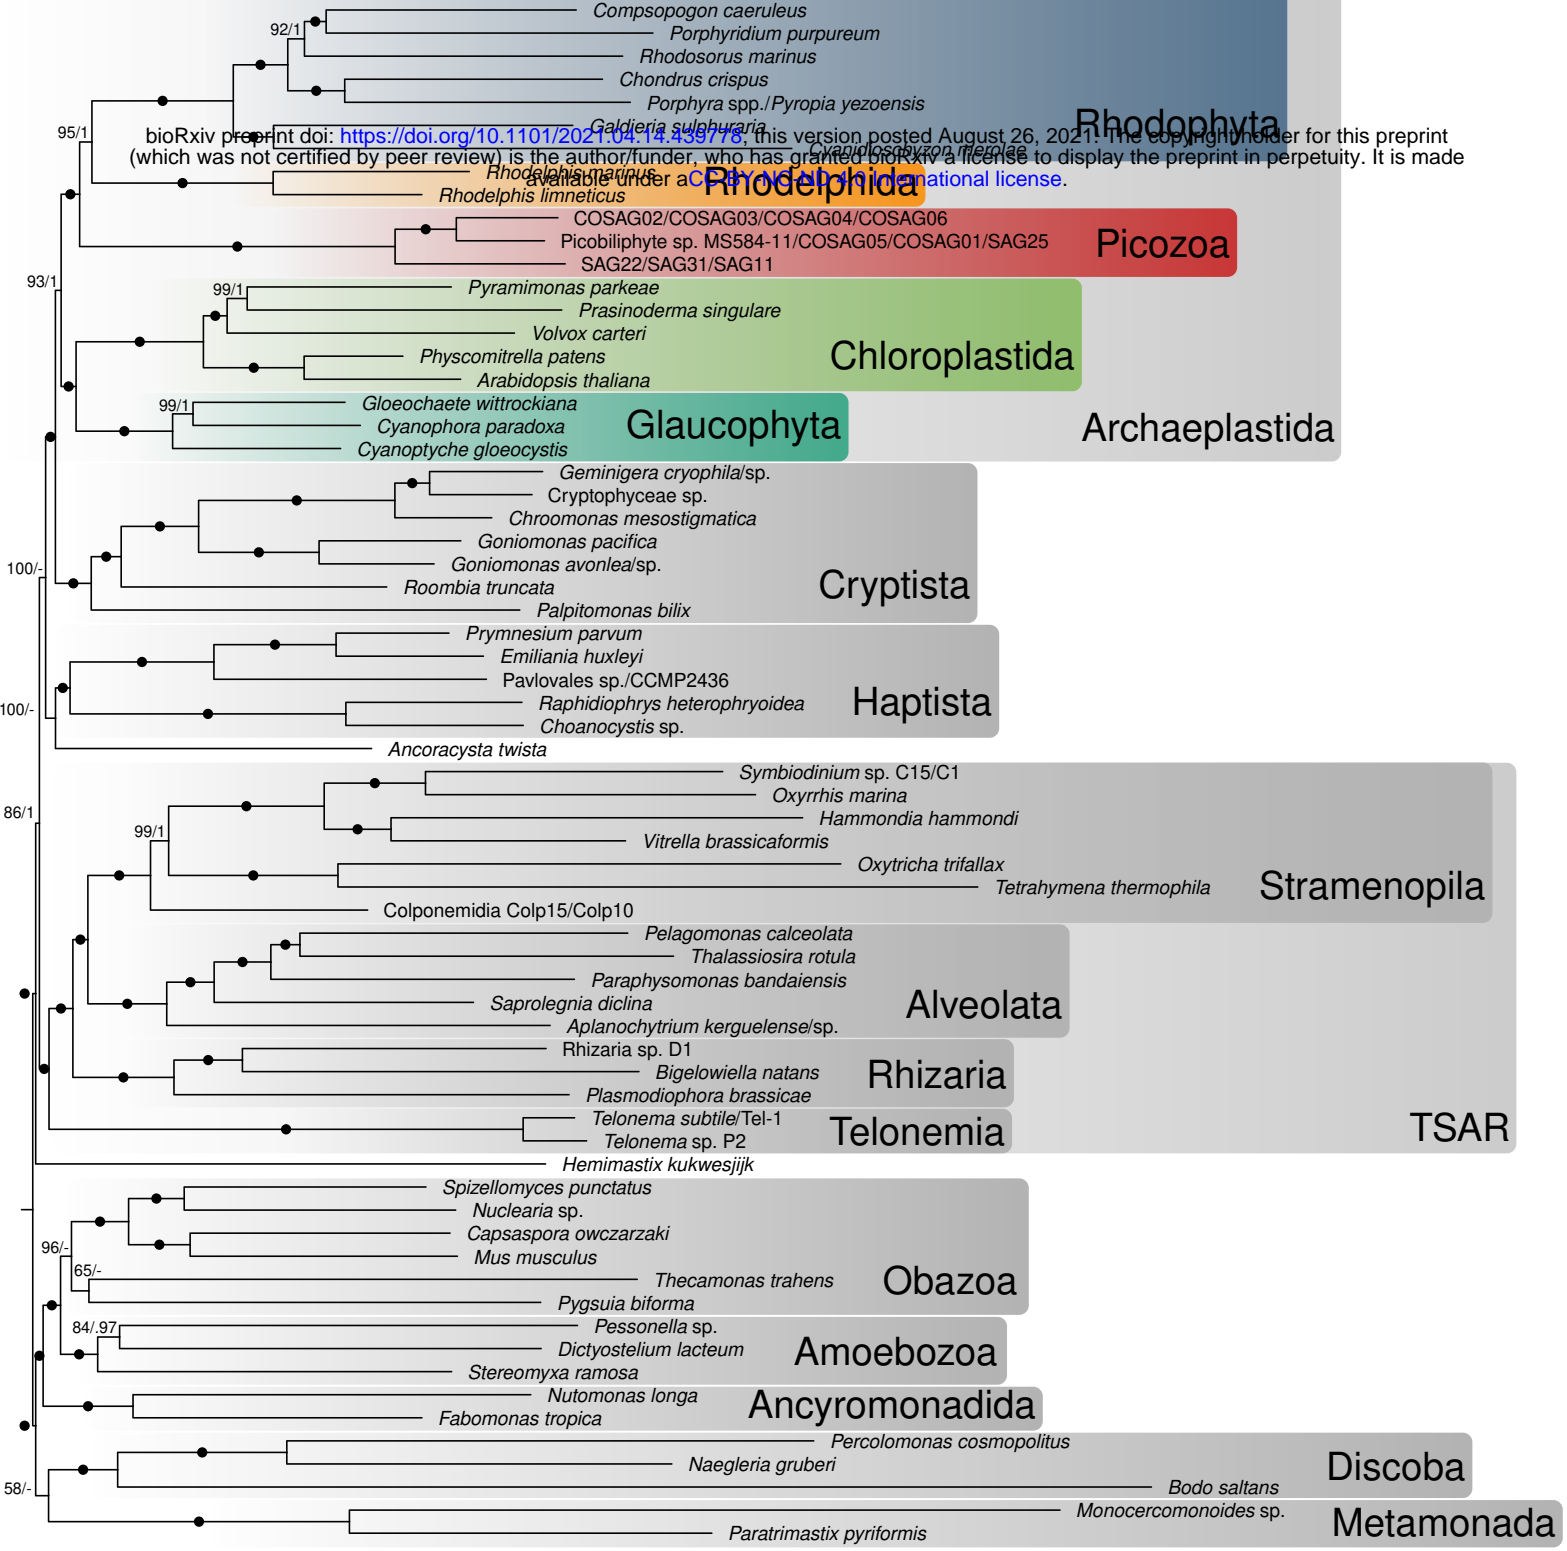

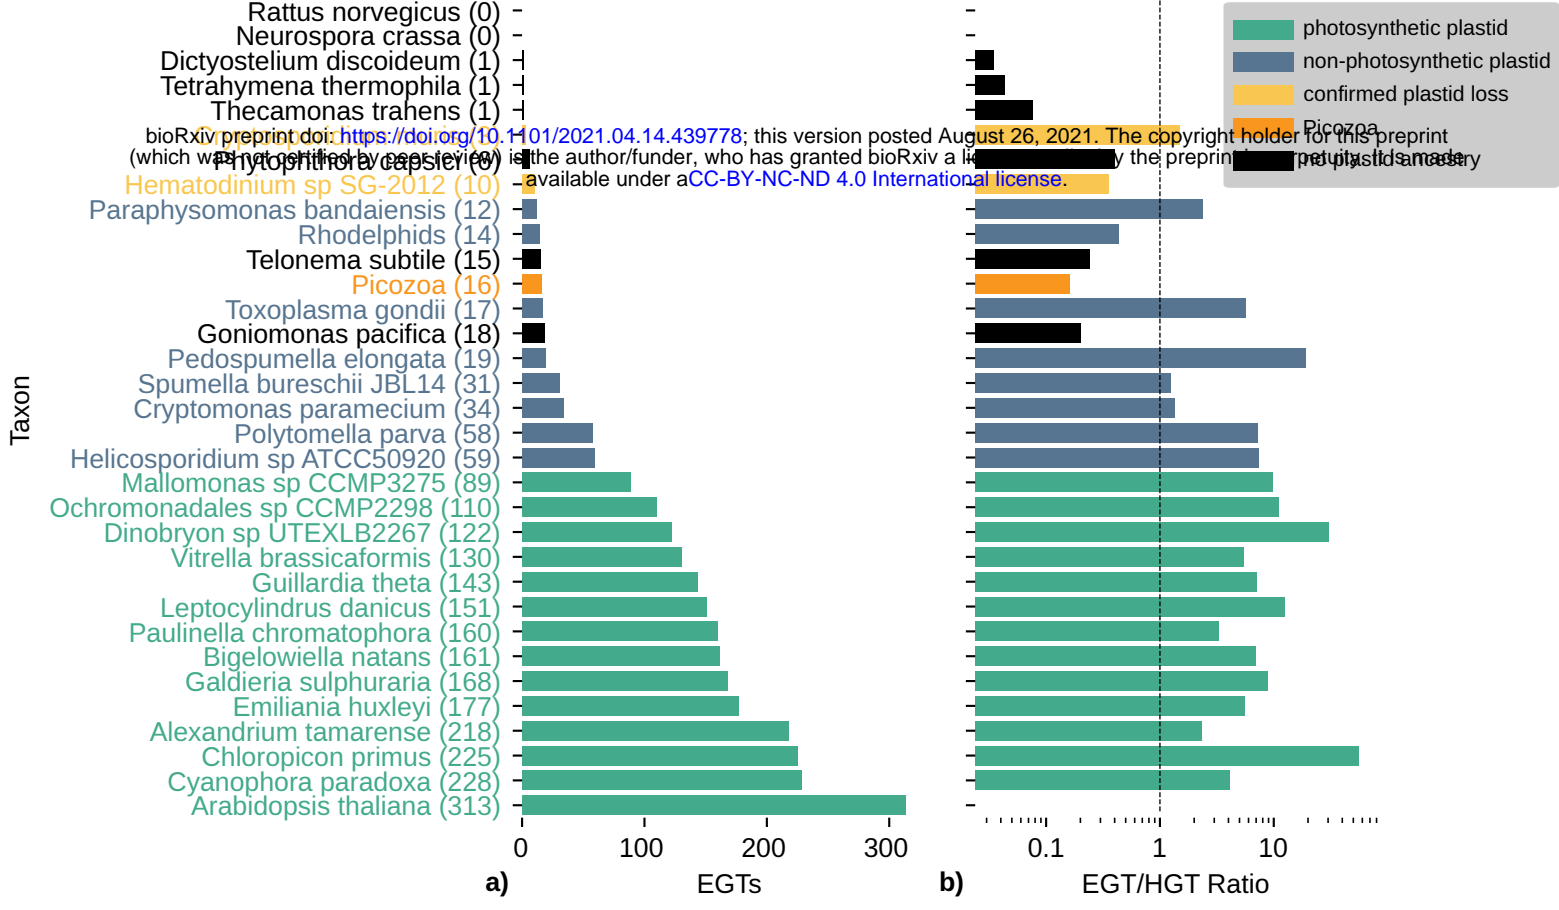

Source: https://www.biorxiv.org/content/biorxiv/early/2021/08/26/2021.04.14.439778.full.pdf
